# Supplementary material
Source: MDPI journal article supplement (https://www.mdpi.com/2071-1050/16/4/1392)
Supplement: s1 [file s1]

# Supplementary Materials:

**Table S1.** InVEST carbon stock model with four types of carbon pools. [C\\_above](#) is for the carbon density of aboveground organisms, [C\\_below](#) is for the carbon density of belowground organisms, [C\\_dead](#) is for the carbon density of dead organic matter, [C\\_soil](#) is for the carbon density of soil organic matter.

| LULC                              | C_above | C_below | C_soil | C_dead | References |
|-----------------------------------|---------|---------|--------|--------|------------|
| Cropland                          | 5.00    | 3.13    | 22.51  | 0.63   | [4]        |
| Woodland                          | 20.04   | 4.54    | 65.59  | 2.26   | [5]        |
| Grassland                         | 12.97   | 1.69    | 40.60  | 1.12   | [6]        |
| Water                             | 0.00    | 0.00    | 0.00   | 0.00   | [6]        |
| Wetland                           | 3.73    | 0.62    | 56.00  | 1.87   | [6]        |
| Urban and rural construction land | 5.12    | 1.02    | 23.11  | 0.00   | [6]        |
| Unused land                       | 6.34    | 1.15    | 20.76  | 0.57   | [7]        |

**Table S2.** Biophysical table of InVEST Urban Flood Risk Mitigation model. [Curve number \(CN\\_A\CN\\_B\CN\\_C\CN\\_D\)](#): The curve number value for this land-use type (LULC) type in the soil group code [A\B\C\D](#)[8].

| LULC                              | CN_A  | CN_B  | CN_C  | CN_D  |
|-----------------------------------|-------|-------|-------|-------|
| Cropland                          | 53.15 | 76.55 | 76.55 | 76.55 |
| Woodland                          | 34.3  | 74.36 | 74.36 | 74.36 |
| Grassland                         | 34.2  | 70.75 | 70.75 | 70.75 |
| Water                             | 0.00  | 0.00  | 0.00  | 0.00  |
| Wetland                           | 0.00  | 0.00  | 0.00  | 0.00  |
| Urban and rural construction land | 52.07 | 64.64 | 64.64 | 64.64 |
| Unused land                       | 69.80 | 69.80 | 69.80 | 69.80 |

**Table S3.** List of selected key conservation species. [The AUC value in the table is a commonly used metric for assessing the accuracy of Maxent's model, with a value between 0 and 1. Typically, the larger the value, the higher the model's accuracy.](#)

| Scientific name                                           | Class | AUC   |
|-----------------------------------------------------------|-------|-------|
| <i>Clematis acerifolia</i> Maxim.                         | flora | 0.994 |
| <i>Schisandra chinensis</i> (Turcz.) Baill.               | flora | 0.994 |
| <i>Pteroceltis tatarinowii</i> Maxim.                     | flora | 0.993 |
| <i>Platycodon grandiflorus</i>                            | flora | 0.971 |
| <i>Dioscorea nipponica</i> Makino                         | flora | 0.961 |
| <i>Juglans mandshurica</i> Maxim.                         | flora | 0.951 |
| <i>Anemarrhena asphodeloides</i> Bunge                    | flora | 0.919 |
| <i>Actinidia arguta</i> (Siebold & Zucc.) Planch. ex Miq. | flora | 0.893 |
| <i>Begonia grandis</i> subsp                              | flora | 0.884 |
| <i>Cynanchum bungei</i> Decne.                            | flora | 0.870 |
| <i>Lilium pumilum</i> Redouté                             | flora | 0.846 |
| <i>Polygonatum sibiricum</i> Redouté                      | flora | 0.845 |
| <i>Scutellaria baicalensis</i> Georgi                     | flora | 0.838 |

|                                                  |           |       |
|--------------------------------------------------|-----------|-------|
| <i>Sorbus alnifolia</i> (Siebold & Zucc.) K.Koch | flora     | 0.807 |
| <i>Codonopsis lanceolata</i>                     | flora     | 0.807 |
| <i>Arctonyx collaris</i>                         | mammal    | 0.981 |
| <i>Myotis pequinius</i>                          | mammal    | 0.980 |
| <i>Erinaceus amurensis</i>                       | mammal    | 0.977 |
| <i>Macaca mulatta</i>                            | mammal    | 0.957 |
| <i>Scaptochirus moschatus</i>                    | mammal    | 0.946 |
| <i>Myotis mystacinus</i>                         | mammal    | 0.941 |
| <i>Sus scrofa</i>                                | mammal    | 0.939 |
| <i>Mustela sibirica</i>                          | mammal    | 0.917 |
| <i>Myotis blythii</i>                            | mammal    | 0.902 |
| <i>Vulpes vulpes</i>                             | mammal    | 0.897 |
| <i>Tamias sibiricus</i>                          | mammal    | 0.888 |
| <i>Barbastella beijingensis</i>                  | mammal    | 0.878 |
| <i>Paguma larvata</i>                            | mammal    | 0.875 |
| <i>Prionailurus bengalensis</i>                  | mammal    | 0.866 |
| <i>Nyctereutes procyonoides</i>                  | mammal    | 0.865 |
| <i>Lepus capensis</i>                            | mammal    | 0.857 |
| <i>Naemorhedus griseus</i>                       | mammal    | 0.848 |
| <i>Ondatra zibethicus</i>                        | mammal    | 0.835 |
| <i>Panthera pardus</i>                           | mammal    | 0.833 |
| <i>Meles meles</i>                               | mammal    | 0.822 |
| <i>Myotis fimbriatus</i>                         | mammal    | 0.813 |
| <i>Sciurus vulgaris</i>                          | mammal    | 0.792 |
| <i>Canis lupus</i>                               | mammal    | 0.689 |
| <i>Pelophylax nigromaculatus</i>                 | amphibian | 0.967 |
| <i>Rhabdophis tigrinus</i>                       | amphibian | 0.926 |
| <i>Lycodon rufozonatus</i>                       | amphibian | 0.886 |
| <i>Plestiodon capifo</i>                         | amphibian | 0.867 |
| <i>Elaphe anomnala</i>                           | amphibian | 0.861 |
| <i>Elaphe dione</i>                              | amphibian | 0.846 |
| <i>Gloydus brevicaudas</i>                       | amphibian | 0.833 |
| <i>Mergus squamatus</i>                          | bird      | 0.991 |
| <i>Aythya ferina</i>                             | bird      | 0.989 |
| <i>Podiceps auritus</i>                          | bird      | 0.985 |
| <i>Anser cygnoid</i>                             | bird      | 0.984 |
| <i>Emberiza jankowskii</i>                       | bird      | 0.981 |
| <i>Acrocephalus tangorum</i>                     | bird      | 0.978 |
| <i>Turdus feae</i>                               | bird      | 0.976 |
| <i>Anser albifrons</i>                           | bird      | 0.975 |
| <i>Ciconia boyciana</i>                          | bird      | 0.974 |
| <i>Otis tarda</i>                                | bird      | 0.970 |
| <i>Emberiza rustica</i>                          | bird      | 0.967 |
| <i>Aythya baeri</i>                              | bird      | 0.963 |

|                             |      |       |
|-----------------------------|------|-------|
| <i>Ichthyaelus relictus</i> | bird | 0.959 |
| <i>Grus monacha</i>         | bird | 0.958 |
| <i>Emberiza aureola</i>     | bird | 0.953 |
| <i>Clanga clanga</i>        | bird | 0.951 |
| <i>Falco cherrug</i>        | bird | 0.929 |
| <i>Grus vipio</i>           | bird | 0.926 |
| <i>Aquila nipalensis</i>    | bird | 0.859 |

**Table S4.** List of environmental factors. 25 factors under two categories of variables, natural environmental factors and anthropogenic disturbances, were used for preliminary prediction of species distribution in MaxEnt software.

| Environmental factor                                                                                                                                                                                                                                                                                                                                                                                                                                                                                                                                                                                                                                                                                                                                                     | Source   | precision | Source website                                                                            |
|--------------------------------------------------------------------------------------------------------------------------------------------------------------------------------------------------------------------------------------------------------------------------------------------------------------------------------------------------------------------------------------------------------------------------------------------------------------------------------------------------------------------------------------------------------------------------------------------------------------------------------------------------------------------------------------------------------------------------------------------------------------------------|----------|-----------|-------------------------------------------------------------------------------------------|
| Bioclimatic variables<br>( Annual Mean Temperature;<br>Mean Diurnal Range (Mean of monthly);<br>Isothermality (BIO2/BIO7) (×100);<br>Temperature Seasonality (standard deviation ×100);<br>Max Temperature of Warmest Month;<br>Min Temperature of Coldest Month;<br>Temperature Annual Range;<br>Mean Temperature of Wettest Quarter;<br>Mean Temperature of Driest Quarter;<br>Mean Temperature of Warmest Quarter;<br>Mean Temperature of Coldest Quarter;<br>Annual Precipitation;<br>Precipitation of Wettest Month;<br>Precipitation of Driest Month;<br>Precipitation Seasonality (Coefficient of Variation);<br>Precipitation of Wettest Quarter;<br>Precipitation of Driest Quarter;<br>Precipitation of Warmest Quarter;<br>Precipitation of Coldest Quarter.) | [1]      | 30"       | <a href="https://worldclim.org">https://worldclim.org</a>                                 |
| Digital Elevation Model                                                                                                                                                                                                                                                                                                                                                                                                                                                                                                                                                                                                                                                                                                                                                  | SRTM     | 90m       | <a href="https://www.resdc.cn/">https://www.resdc.cn/</a>                                 |
| Slope                                                                                                                                                                                                                                                                                                                                                                                                                                                                                                                                                                                                                                                                                                                                                                    | /        | 90m       | /                                                                                         |
| Aspect                                                                                                                                                                                                                                                                                                                                                                                                                                                                                                                                                                                                                                                                                                                                                                   | /        | 90m       | /                                                                                         |
| NDVI                                                                                                                                                                                                                                                                                                                                                                                                                                                                                                                                                                                                                                                                                                                                                                     | [2]      | 250m      | <a href="https://www.earthdata.nasa.gov/">https://www.earthdata.nasa.gov/</a>             |
| Population Density                                                                                                                                                                                                                                                                                                                                                                                                                                                                                                                                                                                                                                                                                                                                                       | [3]      | 1000m     | <a href="https://landscan.ornl.gov/">https://landscan.ornl.gov/</a>                       |
| Nighttime Light                                                                                                                                                                                                                                                                                                                                                                                                                                                                                                                                                                                                                                                                                                                                                          | Luojia 1 | 130m      | <a href="http://59.175.109.173:8888/index.html">http://59.175.109.173:8888/index.html</a> |

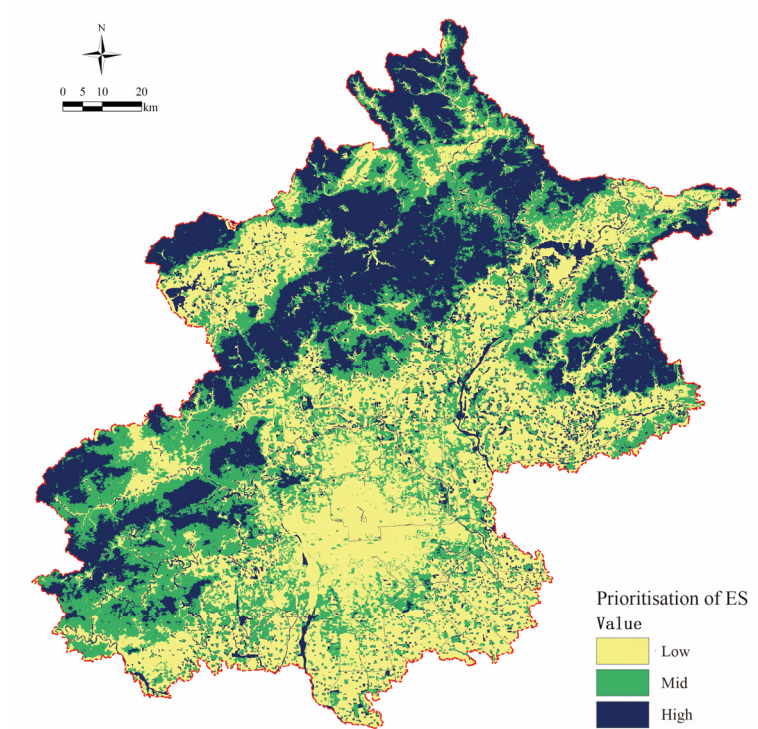

**Figure S1.** Spatial prioritisation of ecosystem service (ES). The distribution of priority areas considering only ES, The top 30% priority as high, top 30-60% as medium, and the bottom 40% as low.

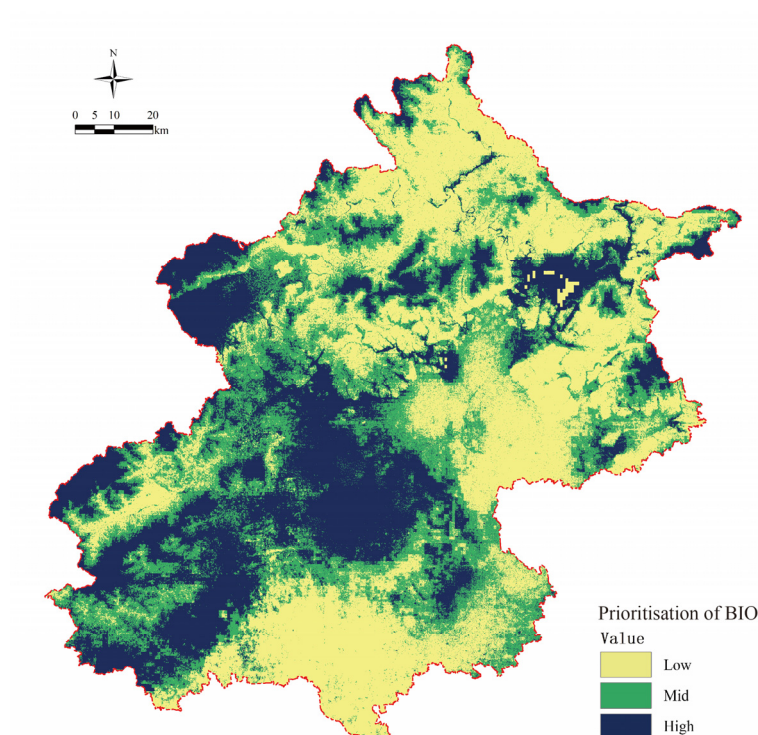

**Figure S2.** Spatial prioritisation of biodiversity (BIO). The distribution of priority areas considering only BIO. The top 30% priority as high, top 30-60% as medium, and the bottom 40% as low.

## References:

- [1] S. E. Fick and R. J. Hijmans, 'WorldClim 2: new 1-km spatial resolution climate surfaces for global land areas', *International Journal of Climatology*, vol. 37, no. 12, pp. 4302–4315, 2017, doi: 10.1002/joc.5086.
- [2] J. Yang *et al.*, 'Divergent shifts in peak photosynthesis timing of temperate and alpine grasslands in China', *Remote Sensing of Environment*, vol. 233, p. 111395, Nov. 2019, doi: 10.1016/j.rse.2019.111395.
- [3] A. Rose, J. McKee, K. Sims, E. Bright, A. Reith, and M. Urban, 'LandScan Global 2020'. Oak Ridge National Laboratory, Oak Ridge, TN, 2021. doi: 10.48690/1523378.
- [4] KONG Xiangbin, HU Yingjie, LI Yue, DUAN Zengqiang. 'Distribution and influencing factors of soil organic carbon of cultivated land topsoil in Beijing'. *Resources Science*, 2019, 41(12): 2307-2315.
- [5] YANG Zhige, ZHOU Bin, YU Xinxiao, FAN Dengxing, ZHANG Yi, and WANG Qi, ' Biodiversity Analysis and Carbon Storage Assessments in Beijing Mountainous Areas', *Bulletin of Soil and Water Conservation*, vol. 32, no. 03, pp. 42–46, 2012, doi: 10.13961/j.cnki.stbctb.2012.03.001.
- [6] XU Li, YU Guirui, HE Nianpeng.' Changes of soil organic carbon storage in Chinese terrestrial ecosystems from the 1980s to the 2010s', *Acta Geographica Sinica*, 73(11): 2150-2167, 2018 doi: 10.11821/dlxb201811008.
- [7] LI Jin-pu, XIA Shao-xia, YU Xiu-bo, et al . 'Evaluation of Carbon Storage on Terrestrial Ecosystem in Hebei Province Based on InVEST Model', *Journal of Ecology and Rural Environment*, 36( 7) : 854 – 861, 2020, doi: 10.19741/j.issn.1673-4831.2019.0918.
- [8] FU Suhua,WANG Hongye,WANG Xiangliang,YUAN Aiping,LU Bingjun. 'The runoff curve number of SCS-CN method in Beijing'. *Geographical Research* , vol. 32, no. 05, pp. 797–807, 2013, doi: 10.11821/yj2013050003.
